# Supplementary material for: Air quality and radiative impacts of downward-propagating sudden stratospheric warmings (SSWs)
Source: Copernicus journal article supplement (doi:10.5194/acp-24-1389-2024), 2024-01-30
Supplement: Supplementary file 1 [file acp-24-1389-2024-supplement.pdf]

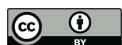

*Supplement of*

## **Air quality and radiative impacts of downward-propagating sudden stratospheric warmings (SSWs)**

**Ryan S. Williams et al.**

*Correspondence to:* Michaela I. Hegglin ([m.i.heggin@reading.ac.uk](mailto:m.i.heggin@reading.ac.uk))

The copyright of individual parts of the supplement might differ from the article licence.

**Williams et al. (2023): Supplementary Information**

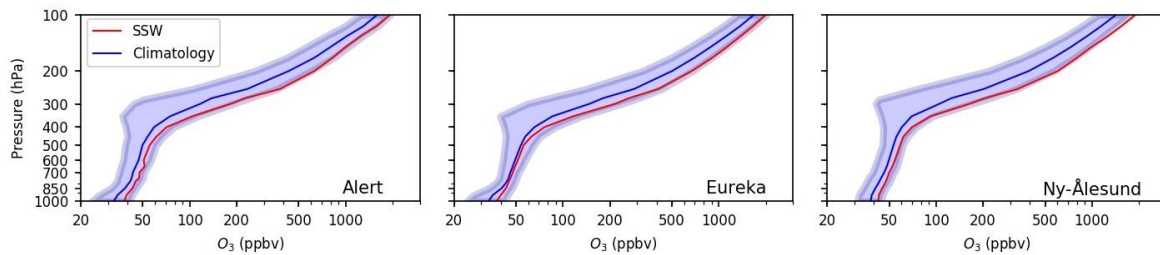

**Figure S1** – Mean PJO-type SSW profiles composited from all profiles within 0 to +70 days of an SSW central warming date with remaining December to April (excluding all SSW profiles) soundings used in compositing a mean climatology profile (when such events occur more frequently). Blue shaded region represents  $1\sigma$  around the climatological mean.

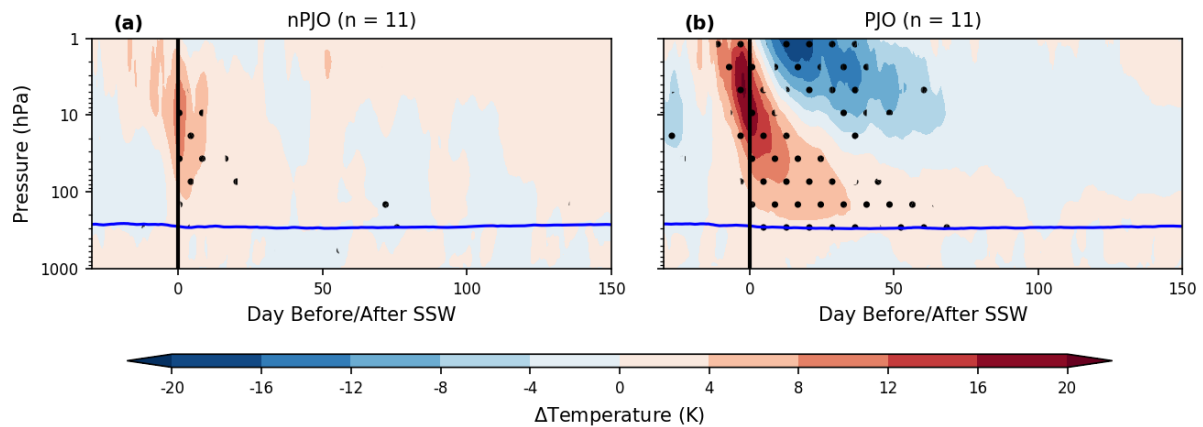

**Figure S2** – Vertical-time composites of polar-cap ( $60\text{--}90^\circ\text{ N}$ ) deseasonalised temperature (K) anomalies for (a) nPJO-type SSWs ( $n = 11$ ) and (b) PJO-type SSWs ( $n = 11$ ) (1980-2013) using specified-dynamics simulations from the EMAC CCM. Statistical significance at the 95 % level ( $p < 0.05$ ) is indicated by stippling. The World Meteorological Organisation (WMO) defined thermal tropopause is displayed for reference in each panel (blue solid line).

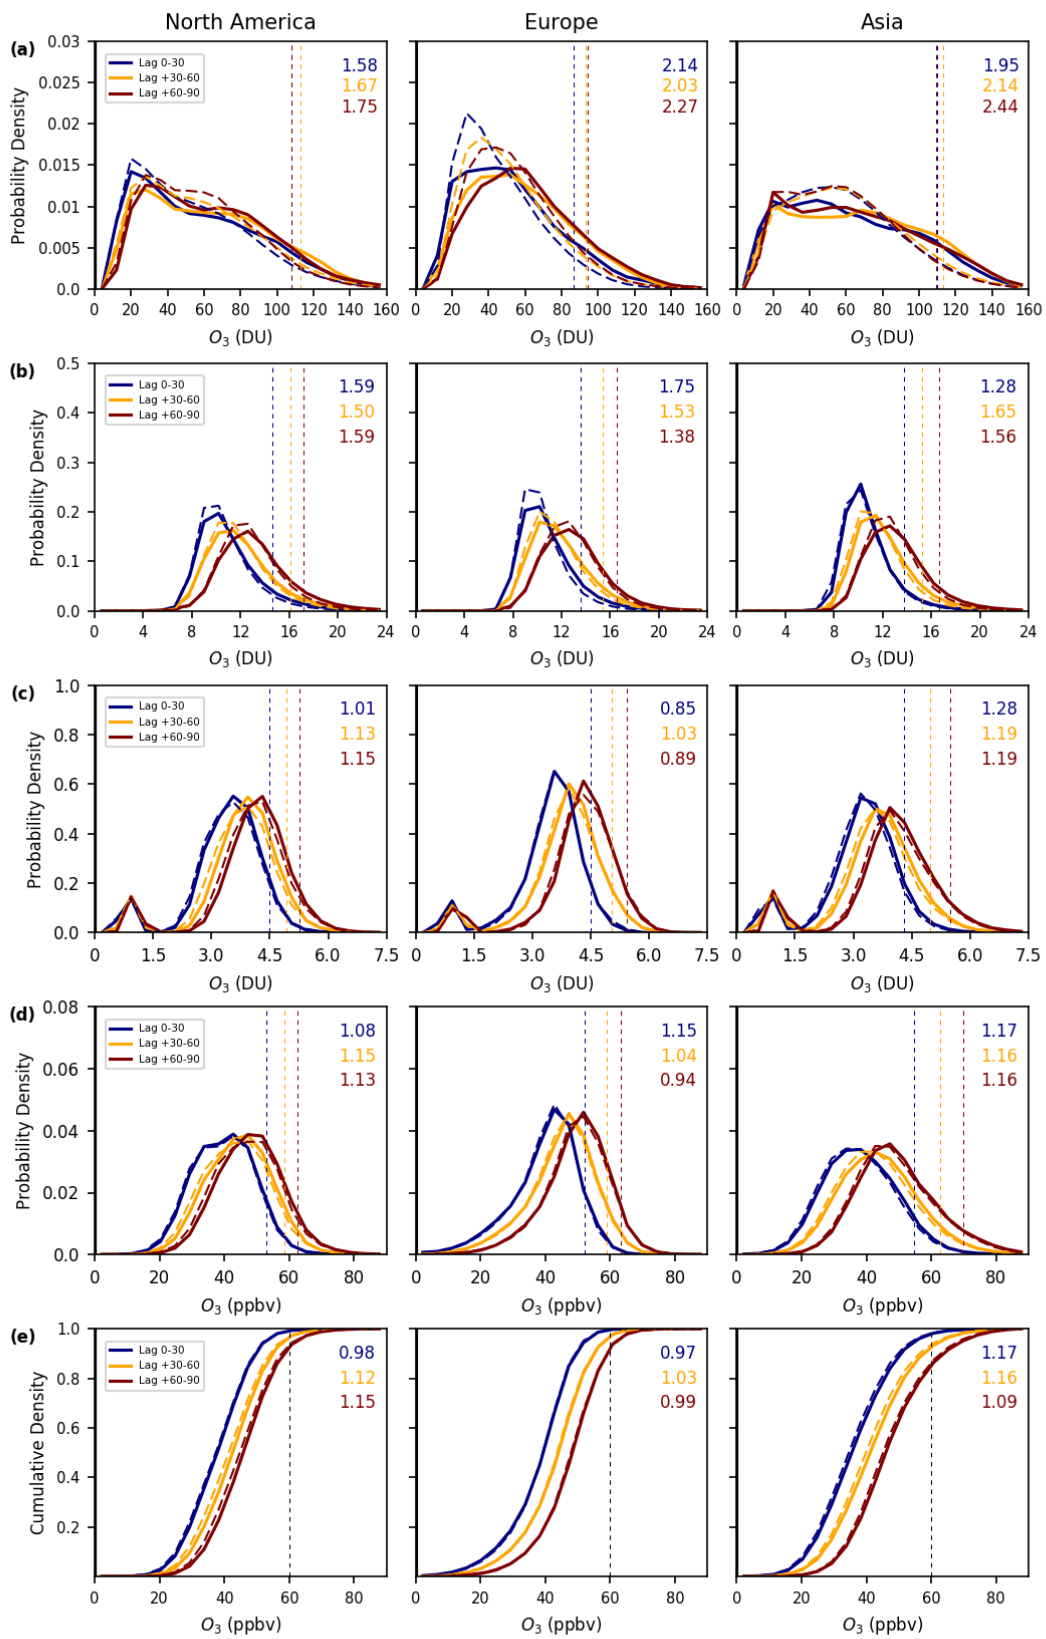

**Figure S3** – Time-area averaged distributions for North America (30° N–70° N, 150° W–60° W), Europe (30° N–70° N, 30° W–30° E) and Asia (30° N–70° N, 30° E–180° E) for (a) the LMS (100–300 hPa), (b) upper troposphere (300–500 hPa), (c) the planetary boundary layer (900–1000 hPa) subcolumn ozone, as well as (d) modelled surface ozone mixing ratios (ppbv) for lags 0–30 days (blue lines), 30–60 days (orange lines) and 60–90 days (red lines) following the SSW central warming date. Solid lines represent SSW composite distributions and dashed lines represent the composite generated from the EMAC climatology (1980–2013) excluding SSW events. The cumulative ozone distributions with respect to climatology for the model surface level are additionally shown (e) to highlight the overall shift towards anomalously high ozone values even near the surface. Risk ratio (RR) values of the probability of an exceedance in the 95-percentile level of each climatological distribution (dashed vertical lines) are indicated, with the exception of (e) where the values represent a RR increase in the likelihood of an exceedance in the 60 ppbv threshold (a typical surface air quality standard).

| Region        | Statistic                   |                        | Lag (days from onset)                                                                 |                                                                                       |                                                                                       |
|---------------|-----------------------------|------------------------|---------------------------------------------------------------------------------------|---------------------------------------------------------------------------------------|---------------------------------------------------------------------------------------|
|               |                             |                        | 0-30                                                                                  | 30-60                                                                                 | 60-90                                                                                 |
| North America | Median                      | Clim<br>SSW<br>P-Value | 55.79 ± 2.10 (51.62, 59.74)<br>60.92 ± 2.71 (55.51, 66.15)<br><b>&lt; 0.001</b>       | 60.35 ± 1.39 (57.42, 62.83)<br>68.66 ± 1.63 (65.65, 71.89)<br><b>&lt; 0.001</b>       | 60.34 ± 0.81 (58.61, 61.73)<br>68.17 ± 2.24 (63.78, 72.59)<br><b>&lt; 0.001</b>       |
|               | 90 <sup>th</sup> Percentile | Clim<br>SSW<br>P-Value | 104.55 ± 3.14 (97.66, 109.85)<br>112.23 ± 2.39 (107.16, 116.64)<br><b>&lt; 0.001</b>  | 106.33 ± 1.84 (102.46, 109.59)<br>117.77 ± 2.30 (113.14, 122.24)<br><b>&lt; 0.001</b> | 102.99 ± 2.50 (98.07, 107.71)<br>114.54 ± 4.18 (106.21, 122.62)<br><b>&lt; 0.001</b>  |
|               | 95 <sup>th</sup> Percentile | Clim<br>SSW<br>P-Value | 118.32 ± 2.86 (111.84, 122.96)<br>124.67 ± 2.54 (119.34, 129.50)<br><b>&lt; 0.001</b> | 119.14 ± 1.90 (114.94, 122.36)<br>128.97 ± 2.46 (124.41, 134.06)<br><b>&lt; 0.001</b> | 115.81 ± 3.26 (109.08, 121.74)<br>127.75 ± 5.23 (117.17, 137.49)<br><b>&lt; 0.001</b> |
| Europe        | Median                      | Clim<br>SSW<br>P-Value | 44.76 ± 1.76 (41.12, 47.96)<br>53.38 ± 2.24 (49.22, 58.03)<br><b>&lt; 0.001</b>       | 50.68 ± 1.51 (47.67, 53.59)<br>59.88 ± 1.65 (56.87, 63.26)<br><b>&lt; 0.001</b>       | 55.19 ± 1.08 (52.95, 57.19)<br>62.50 ± 1.65 (59.59, 65.98)<br><b>&lt; 0.001</b>       |
|               | 90 <sup>th</sup> Percentile | Clim<br>SSW<br>P-Value | 83.40 ± 2.24 (78.48, 87.20)<br>96.88 ± 4.20 (89.37, 105.80)<br><b>&lt; 0.001</b>      | 89.91 ± 1.90 (85.84, 93.25)<br>102.12 ± 1.87 (98.42, 105.61)<br><b>&lt; 0.001</b>     | 91.68 ± 1.43 (88.82, 94.34)<br>105.53 ± 3.29 (98.47, 111.34)<br><b>&lt; 0.001</b>     |
|               | 95 <sup>th</sup> Percentile | Clim<br>SSW<br>P-Value | 94.13 ± 2.34 (89.11, 98.29)<br>110.01 ± 5.81 (99.75, 121.87)<br><b>&lt; 0.001</b>     | 101.22 ± 1.91 (97.21, 104.68)<br>113.24 ± 1.98 (109.30, 117.07)<br><b>&lt; 0.001</b>  | 102.39 ± 1.58 (99.01, 105.20)<br>117.14 ± 3.15 (110.55, 122.99)<br><b>&lt; 0.001</b>  |
| Asia          | Median                      | Clim<br>SSW<br>P-Value | 59.71 ± 2.15 (55.13, 63.56)<br>67.47 ± 2.45 (62.97, 72.61)<br><b>&lt; 0.001</b>       | 62.75 ± 0.91 (60.95, 64.51)<br>74.75 ± 1.36 (72.01, 77.30)<br><b>&lt; 0.001</b>       | 61.42 ± 1.20 (59.07, 63.78)<br>71.29 ± 2.40 (66.46, 75.68)<br><b>&lt; 0.001</b>       |
|               | 90 <sup>th</sup> Percentile | Clim<br>SSW<br>P-Value | 102.66 ± 3.11 (96.06, 108.19)<br>116.47 ± 3.91 (109.01, 124.27)<br><b>&lt; 0.001</b>  | 105.87 ± 1.28 (103.27, 108.22)<br>121.72 ± 2.38 (117.37, 126.68)<br><b>&lt; 0.001</b> | 103.17 ± 2.16 (98.79, 107.28)<br>121.25 ± 3.30 (113.82, 126.64)<br><b>&lt; 0.001</b>  |
|               | 95 <sup>th</sup> Percentile | Clim<br>SSW<br>P-Value | 115.02 ± 3.40 (107.69, 120.90)<br>127.56 ± 4.22 (118.70, 135.10)<br><b>&lt; 0.001</b> | 117.94 ± 1.35 (115.13, 120.44)<br>132.20 ± 2.63 (127.40, 137.46)<br><b>&lt; 0.001</b> | 115.06 ± 2.50 (109.70, 119.47)<br>132.36 ± 2.96 (125.56, 137.08)<br><b>&lt; 0.001</b> |

**Table S1** – 100–300 hPa subcolumn median, 90<sup>th</sup> percentile and 95<sup>th</sup> percentile ozone of stratospheric origin (O<sub>3</sub>S) values (DU) for each regionally derived climatological (Clim) and PJO-type SSW composited (n = 11) distributions over the 1980-2013 period of the EMAC model simulations. One standard deviation (1σ) around each value is indicated, with the numbers in parentheses representing the 95 % confidence intervals around each value (as determined through bootstrap sampling with replacement over 10000 iterations). The associated p-value from a two-sample t-test is additionally shown and highlighted in red where statistical significance is inferred (p < 0.05), as are cases where the 95 % confidence intervals do not overlap.

| Region        | Statistic                   |                        | Lag (days from onset)                                                 |                                                                       |                                                                       |
|---------------|-----------------------------|------------------------|-----------------------------------------------------------------------|-----------------------------------------------------------------------|-----------------------------------------------------------------------|
|               |                             |                        | 0-30                                                                  | 30-60                                                                 | 60-90                                                                 |
| North America | Median                      | Clim<br>SSW<br>P-Value | 6.55 ± 0.21 (6.11, 6.93)<br>6.74 ± 0.19 (6.36, 7.11)<br>0.038         | 6.90 ± 0.11 (6.66, 7.08)<br>7.10 ± 0.14 (6.83, 7.38)<br>0.001         | 6.93 ± 0.06 (6.81, 7.05)<br>7.35 ± 0.11 (7.13, 7.56)<br>< 0.001       |
|               | 90 <sup>th</sup> Percentile | Clim<br>SSW<br>P-Value | 11.47 ± 0.34 (10.75, 12.09)<br>12.60 ± 0.41 (11.79, 13.41)<br>< 0.001 | 12.40 ± 0.25 (11.88, 12.89)<br>13.58 ± 0.48 (12.68, 14.54)<br>< 0.001 | 12.98 ± 0.14 (12.70, 13.25)<br>14.08 ± 0.24 (13.58, 14.52)<br>< 0.001 |
|               | 95 <sup>th</sup> Percentile | Clim<br>SSW<br>P-Value | 13.22 ± 0.42 (12.35, 13.99)<br>14.75 ± 0.51 (13.74, 15.72)<br>< 0.001 | 14.35 ± 0.29 (13.72, 14.88)<br>15.91 ± 0.62 (14.73, 17.09)<br>< 0.001 | 14.97 ± 0.18 (14.60, 15.29)<br>16.43 ± 0.27 (15.87, 16.92)<br>< 0.001 |
| Europe        | Median                      | Clim<br>SSW<br>P-Value | 5.86 ± 0.16 (5.54, 6.19)<br>6.48 ± 0.22 (6.06, 6.91)<br>< 0.001       | 6.39 ± 0.17 (6.04, 6.70)<br>6.83 ± 0.18 (6.50, 7.20)<br>< 0.001       | 6.75 ± 0.09 (6.55, 6.91)<br>7.17 ± 0.13 (6.93, 7.42)<br>< 0.001       |
|               | 90 <sup>th</sup> Percentile | Clim<br>SSW<br>P-Value | 10.15 ± 0.39 (9.40, 10.91)<br>11.41 ± 0.47 (10.55, 12.36)<br>< 0.001  | 11.41 ± 0.37 (10.68, 12.12)<br>12.37 ± 0.35 (11.72, 13.06)<br>< 0.001 | 12.08 ± 0.21 (11.67, 12.47)<br>12.68 ± 0.15 (12.38, 12.96)<br>< 0.001 |
|               | 95 <sup>th</sup> Percentile | Clim<br>SSW<br>P-Value | 11.91 ± 0.49 (10.92, 12.85)<br>13.30 ± 0.59 (12.18, 14.47)<br>< 0.001 | 13.36 ± 0.43 (12.49, 14.12)<br>14.45 ± 0.44 (13.61, 15.31)<br>< 0.001 | 13.96 ± 0.20 (13.56, 14.36)<br>14.64 ± 0.18 (14.28, 15.01)<br>< 0.001 |
| Asia          | Median                      | Clim<br>SSW<br>P-Value | 6.27 ± 0.19 (5.89, 6.62)<br>6.52 ± 0.17 (6.21, 6.87)<br>0.004         | 6.67 ± 0.12 (6.42, 6.88)<br>7.27 ± 0.16 (6.96, 7.61)<br>< 0.001       | 6.92 ± 0.04 (6.85, 6.99)<br>7.36 ± 0.13 (7.13, 7.63)<br>< 0.001       |
|               | 90 <sup>th</sup> Percentile | Clim<br>SSW<br>P-Value | 10.27 ± 0.30 (9.66, 10.81)<br>10.88 ± 0.39 (10.13, 11.62)<br>< 0.001  | 11.07 ± 0.23 (10.57, 11.49)<br>12.73 ± 0.45 (11.83, 13.59)<br>< 0.001 | 11.78 ± 0.18 (11.41, 12.12)<br>13.20 ± 0.40 (12.38, 13.94)<br>< 0.001 |
|               | 95 <sup>th</sup> Percentile | Clim<br>SSW<br>P-Value | 11.90 ± 0.36 (11.17, 12.56)<br>12.64 ± 0.47 (11.71, 13.53)<br>< 0.001 | 12.81 ± 0.28 (12.21, 13.31)<br>14.81 ± 0.50 (13.80, 15.75)<br>< 0.001 | 13.62 ± 0.20 (13.20, 13.99)<br>15.25 ± 0.43 (14.36, 16.04)<br>< 0.001 |

Table S2 – Same as Table S1 but for the 300–500 hPa subcolumn (upper troposphere).

| Region        | Statistic                   |                        | Lag (days from onset)                                           |                                                                 |                                                                 |
|---------------|-----------------------------|------------------------|-----------------------------------------------------------------|-----------------------------------------------------------------|-----------------------------------------------------------------|
|               |                             |                        | 0-30                                                            | 30-60                                                           | 60-90                                                           |
| North America | Median                      | Clim<br>SSW<br>P-Value | 1.65 ± 0.04 (1.57, 1.72)<br>1.75 ± 0.03 (1.69, 1.82)<br>< 0.001 | 1.69 ± 0.03 (1.63, 1.74)<br>1.86 ± 0.03 (1.80, 1.92)<br>< 0.001 | 1.54 ± 0.08 (1.37, 1.67)<br>1.75 ± 0.08 (1.58, 1.88)<br>< 0.001 |
|               | 90 <sup>th</sup> Percentile | Clim<br>SSW<br>P-Value | 2.06 ± 0.03 (1.98, 2.11)<br>2.15 ± 0.04 (2.08, 2.23)<br>< 0.001 | 2.10 ± 0.02 (2.05, 2.14)<br>2.30 ± 0.05 (2.21, 2.39)<br>< 0.001 | 2.02 ± 0.04 (1.91, 2.09)<br>2.24 ± 0.04 (2.16, 2.31)<br>< 0.001 |
|               | 95 <sup>th</sup> Percentile | Clim<br>SSW<br>P-Value | 2.17 ± 0.03 (2.10, 2.22)<br>2.26 ± 0.04 (2.18, 2.35)<br>< 0.001 | 2.21 ± 0.03 (2.16, 2.26)<br>2.42 ± 0.05 (2.32, 2.51)<br>< 0.001 | 2.14 ± 0.04 (2.04, 2.21)<br>2.36 ± 0.04 (2.29, 2.42)<br>< 0.001 |
| Europe        | Median                      | Clim<br>SSW<br>P-Value | 1.71 ± 0.04 (1.62, 1.77)<br>1.77 ± 0.03 (1.71, 1.83)<br>< 0.001 | 1.72 ± 0.03 (1.65, 1.77)<br>1.85 ± 0.04 (1.72, 1.91)<br>< 0.001 | 1.56 ± 0.08 (1.39, 1.70)<br>1.69 ± 0.09 (1.50, 1.85)<br>0.002   |
|               | 90 <sup>th</sup> Percentile | Clim<br>SSW<br>P-Value | 2.09 ± 0.04 (2.01, 2.15)<br>2.19 ± 0.06 (2.08, 2.30)<br>< 0.001 | 2.10 ± 0.03 (2.04, 2.15)<br>2.25 ± 0.03 (2.18, 2.30)<br>< 0.001 | 2.04 ± 0.05 (1.93, 2.13)<br>2.25 ± 0.07 (2.11, 2.37)<br>< 0.001 |
|               | 95 <sup>th</sup> Percentile | Clim<br>SSW<br>P-Value | 2.19 ± 0.03 (2.12, 2.25)<br>2.30 ± 0.06 (2.19, 2.40)<br>< 0.001 | 2.21 ± 0.03 (2.15, 2.26)<br>2.36 ± 0.03 (2.30, 2.42)<br>< 0.001 | 2.16 ± 0.05 (2.06, 2.24)<br>2.38 ± 0.06 (2.25, 2.48)<br>< 0.001 |
| Asia          | Median                      | Clim<br>SSW<br>P-Value | 1.61 ± 0.04 (1.52, 1.68)<br>1.69 ± 0.04 (1.61, 1.77)<br>< 0.001 | 1.65 ± 0.03 (1.59, 1.71)<br>1.82 ± 0.03 (1.77, 1.87)<br>< 0.001 | 1.52 ± 0.07 (1.38, 1.64)<br>1.74 ± 0.07 (1.58, 1.84)<br>< 0.001 |
|               | 90 <sup>th</sup> Percentile | Clim<br>SSW<br>P-Value | 2.00 ± 0.04 (1.92, 2.06)<br>2.09 ± 0.05 (1.99, 2.18)<br>< 0.001 | 2.04 ± 0.03 (1.97, 2.10)<br>2.21 ± 0.04 (2.14, 2.29)<br>< 0.001 | 1.96 ± 0.04 (1.86, 2.03)<br>2.18 ± 0.04 (2.10, 2.25)<br>< 0.001 |
|               | 95 <sup>th</sup> Percentile | Clim<br>SSW<br>P-Value | 2.10 ± 0.04 (2.02, 2.16)<br>2.20 ± 0.05 (2.10, 2.29)<br>< 0.001 | 2.15 ± 0.04 (2.07, 2.21)<br>2.32 ± 0.04 (2.24, 2.40)<br>< 0.001 | 2.07 ± 0.04 (1.98, 2.14)<br>2.29 ± 0.04 (2.22, 2.36)<br>< 0.001 |

Table S3 – Same as Tables S1 and S2 but for the 900–1000 hPa subcolumn (PBL approximation).

| Region        | Statistic                   |                        | Lag (days from onset)                                                 |                                                                       |                                                                       |
|---------------|-----------------------------|------------------------|-----------------------------------------------------------------------|-----------------------------------------------------------------------|-----------------------------------------------------------------------|
|               |                             |                        | 0-30                                                                  | 30-60                                                                 | 60-90                                                                 |
| North America | Median                      | Clim<br>SSW<br>P-Value | 17.94 ± 0.43 (17.05, 18.71)<br>18.86 ± 0.39 (18.14, 19.64)<br>< 0.001 | 18.28 ± 0.32 (17.61, 18.86)<br>20.16 ± 0.40 (19.40, 20.95)<br>< 0.001 | 16.71 ± 0.88 (14.78, 18.18)<br>19.08 ± 0.88 (17.10, 20.49)<br>< 0.001 |
|               | 90 <sup>th</sup> Percentile | Clim<br>SSW<br>P-Value | 23.88 ± 0.42 (22.97, 24.59)<br>24.85 ± 0.51 (23.86, 25.82)<br>< 0.001 | 24.29 ± 0.33 (23.58, 24.85)<br>26.50 ± 0.45 (25.64, 27.40)<br>< 0.001 | 23.13 ± 0.64 (21.69, 24.17)<br>25.88 ± 0.50 (24.76, 26.68)<br>< 0.001 |
|               | 95 <sup>th</sup> Percentile | Clim<br>SSW<br>P-Value | 25.45 ± 0.41 (24.53, 26.14)<br>26.47 ± 0.59 (25.31, 27.58)<br>< 0.001 | 25.94 ± 0.31 (25.28, 26.47)<br>28.22 ± 0.53 (27.20, 29.30)<br>< 0.001 | 24.94 ± 0.57 (23.65, 25.88)<br>27.58 ± 0.41 (26.67, 28.25)<br>< 0.001 |
| Europe        | Median                      | Clim<br>SSW<br>P-Value | 19.35 ± 0.47 (18.38, 20.19)<br>20.14 ± 0.38 (19.46, 20.96)<br>< 0.001 | 19.43 ± 0.38 (18.63, 20.13)<br>20.91 ± 0.49 (19.80, 21.71)<br>< 0.001 | 17.40 ± 1.02 (15.28, 19.20)<br>18.83 ± 1.23 (16.30, 20.99)<br>0.008   |
|               | 90 <sup>th</sup> Percentile | Clim<br>SSW<br>P-Value | 25.02 ± 0.46 (24.00, 25.81)<br>26.20 ± 0.73 (24.92, 27.70)<br>< 0.001 | 25.22 ± 0.39 (24.40, 25.90)<br>26.95 ± 0.33 (26.26, 27.56)<br>< 0.001 | 24.34 ± 0.66 (22.92, 25.48)<br>26.99 ± 0.86 (25.21, 28.51)<br>< 0.001 |
|               | 95 <sup>th</sup> Percentile | Clim<br>SSW<br>P-Value | 26.43 ± 0.44 (25.44, 27.18)<br>27.84 ± 0.77 (26.33, 29.21)<br>< 0.001 | 26.70 ± 0.38 (25.87, 27.34)<br>28.47 ± 0.36 (27.73, 29.15)<br>< 0.001 | 25.99 ± 0.65 (24.62, 27.09)<br>28.72 ± 0.76 (27.10, 29.98)<br>< 0.001 |
| Asia          | Median                      | Clim<br>SSW<br>P-Value | 17.06 ± 0.52 (15.95, 18.00)<br>17.66 ± 0.51 (16.68, 18.67)<br>0.013   | 17.89 ± 0.37 (17.15, 18.58)<br>19.61 ± 0.36 (18.94, 20.36)<br>< 0.001 | 16.87 ± 0.65 (15.44, 17.99)<br>19.11 ± 0.70 (17.55, 20.29)<br>< 0.001 |
|               | 90 <sup>th</sup> Percentile | Clim<br>SSW<br>P-Value | 23.29 ± 0.47 (22.27, 24.10)<br>24.33 ± 0.57 (23.23, 25.44)<br>< 0.001 | 24.05 ± 0.37 (23.29, 24.72)<br>25.99 ± 0.44 (25.13, 26.85)<br>< 0.001 | 23.54 ± 0.44 (22.58, 24.28)<br>25.69 ± 0.39 (24.91, 26.41)<br>< 0.001 |
|               | 95 <sup>th</sup> Percentile | Clim<br>SSW<br>P-Value | 25.03 ± 0.46 (24.01, 25.81)<br>26.14 ± 0.65 (24.83, 27.35)<br>< 0.001 | 25.96 ± 0.38 (25.15, 26.65)<br>27.80 ± 0.51 (26.79, 28.76)<br>< 0.001 | 25.77 ± 0.32 (25.08, 26.33)<br>27.66 ± 0.45 (26.77, 28.50)<br>< 0.001 |

Table S4 – Same as Tables S1–S3 but for the model surface level.

| Region        | Statistic                      |                        | Lag (days from onset)                                                                 |                                                                                       |                                                                                       |
|---------------|--------------------------------|------------------------|---------------------------------------------------------------------------------------|---------------------------------------------------------------------------------------|---------------------------------------------------------------------------------------|
|               |                                |                        | 0-30                                                                                  | 30-60                                                                                 | 60-90                                                                                 |
| North America | Median                         | Clim<br>SSW<br>P-Value | 56.28 ± 2.12 (52.06, 60.30)<br>61.48 ± 2.71 (56.18, 66.71)<br><b>&lt; 0.001</b>       | 60.93 ± 1.39 (58.05, 63.45)<br>69.28 ± 1.64 (66.22, 72.48)<br><b>&lt; 0.001</b>       | 61.12 ± 0.76 (59.46, 62.46)<br>68.97 ± 2.19 (64.73, 73.22)<br><b>&lt; 0.001</b>       |
|               | 90 <sup>th</sup><br>Percentile | Clim<br>SSW<br>P-Value | 104.58 ± 3.17 (97.52, 109.84)<br>112.26 ± 2.34 (107.37, 116.57)<br><b>&lt; 0.001</b>  | 106.34 ± 1.84 (102.47, 109.67)<br>117.81 ± 2.31 (113.14, 122.23)<br><b>&lt; 0.001</b> | 103.05 ± 2.47 (98.15, 107.74)<br>114.61 ± 4.21 (107.43, 122.57)<br><b>&lt; 0.001</b>  |
|               | 95 <sup>th</sup><br>Percentile | Clim<br>SSW<br>P-Value | 118.33 ± 2.88 (111.68, 122.94)<br>124.69 ± 2.50 (119.55, 129.37)<br><b>&lt; 0.001</b> | 119.12 ± 1.90 (114.98, 122.39)<br>128.99 ± 2.47 (124.37, 134.09)<br><b>&lt; 0.001</b> | 115.81 ± 3.21 (109.15, 121.69)<br>127.80 ± 5.29 (117.19, 137.58)<br><b>&lt; 0.001</b> |
| Europe        | Median                         | Clim<br>SSW<br>P-Value | 45.68 ± 1.74 (42.06, 48.83)<br>54.01 ± 2.23 (49.92, 58.64)<br><b>&lt; 0.001</b>       | 51.66 ± 1.52 (48.64, 54.58)<br>60.84 ± 1.66 (57.78, 64.25)<br><b>&lt; 0.001</b>       | 56.37 ± 1.08 (54.09, 58.35)<br>63.57 ± 1.62 (60.77, 67.17)<br><b>&lt; 0.001</b>       |
|               | 90 <sup>th</sup><br>Percentile | Clim<br>SSW<br>P-Value | 83.56 ± 2.17 (78.86, 87.33)<br>96.86 ± 4.13 (89.52, 105.57)<br><b>&lt; 0.001</b>      | 89.99 ± 1.90 (85.92, 93.29)<br>102.17 ± 1.88 (98.49, 105.74)<br><b>&lt; 0.001</b>     | 91.78 ± 1.41 (88.95, 94.42)<br>105.60 ± 3.29 (98.62, 111.25)<br><b>&lt; 0.001</b>     |
|               | 95 <sup>th</sup><br>Percentile | Clim<br>SSW<br>P-Value | 94.23 ± 2.29 (89.39, 98.36)<br>109.89 ± 5.76 (99.82, 121.79)<br><b>&lt; 0.001</b>     | 101.25 ± 1.92 (97.25, 104.71)<br>113.25 ± 1.98 (109.38, 117.20)<br><b>&lt; 0.001</b>  | 102.43 ± 1.58 (99.09, 105.23)<br>117.15 ± 3.16 (110.53, 122.84)<br><b>&lt; 0.001</b>  |
| Asia          | Median                         | Clim<br>SSW<br>P-Value | 60.15 ± 2.13 (55.70, 63.98)<br>67.92 ± 2.43 (63.36, 72.99)<br><b>0.003</b>            | 63.35 ± 0.89 (61.62, 65.10)<br>75.23 ± 1.33 (72.53, 77.74)<br><b>&lt; 0.001</b>       | 62.26 ± 1.11 (60.06, 64.44)<br>72.06 ± 2.30 (67.42, 76.32)<br><b>&lt; 0.001</b>       |
|               | 90 <sup>th</sup><br>Percentile | Clim<br>SSW<br>P-Value | 102.70 ± 3.09 (96.14, 108.26)<br>116.57 ± 3.89 (109.20, 124.24)<br><b>&lt; 0.001</b>  | 105.92 ± 1.28 (103.32, 108.28)<br>121.75 ± 2.35 (117.55, 126.68)<br><b>&lt; 0.001</b> | 103.22 ± 2.16 (98.88, 107.28)<br>121.28 ± 3.29 (113.84, 126.84)<br><b>&lt; 0.001</b>  |
|               | 95 <sup>th</sup><br>Percentile | Clim<br>SSW<br>P-Value | 115.02 ± 3.38 (107.66, 120.92)<br>127.65 ± 4.19 (118.98, 135.09)<br><b>&lt; 0.001</b> | 117.95 ± 1.36 (115.17, 120.45)<br>132.22 ± 2.59 (127.49, 137.45)<br><b>&lt; 0.001</b> | 115.08 ± 2.51 (109.78, 119.42)<br>132.35 ± 2.98 (125.44, 137.21)<br><b>&lt; 0.001</b> |

**Table S5** – 100–300 hPa subcolumn median, 90<sup>th</sup> percentile and 95<sup>th</sup> percentile ozone values (DU) for each regionally derived climatological (clim) and PJO-type SSW composited (n = 11) distributions over the 1980-2013 period of the EMAC model simulations. One standard deviation (1 $\sigma$ ) around each value is indicated, with the numbers in parentheses representing the 95 % confidence intervals around each value (as determined through bootstrap sampling with replacement over 10000 iterations). The associated p-value from a two-sample t-test is additionally shown and highlighted in red where statistical significance is inferred ( $p < 0.05$ ), as are cases where the 95 % confidence intervals do not overlap.



| Region        | Statistic                   |         | Lag (days from onset)       |                             |                             |
|---------------|-----------------------------|---------|-----------------------------|-----------------------------|-----------------------------|
|               |                             |         | 0-30                        | 30-60                       | 60-90                       |
| North America | Median                      | Clim    | 10.33 ± 0.28 (9.81, 10.90)  | 11.46 ± 0.35 (10.78, 12.14) | 12.60 ± 0.32 (11.91, 13.16) |
|               |                             | SSW     | 10.65 ± 0.31 (10.08, 11.30) | 11.72 ± 0.39 (10.98, 12.50) | 12.92 ± 0.29 (12.41, 13.45) |
|               | P-Value                     | 0.020   | 0.115                       | 0.023                       |                             |
| North America | 90 <sup>th</sup> Percentile | Clim    | 13.62 ± 0.41 (12.79, 14.41) | 15.07 ± 0.38 (14.27, 15.74) | 16.26 ± 0.27 (15.68, 16.71) |
|               |                             | SSW     | 14.63 ± 0.50 (13.66, 15.63) | 15.99 ± 0.55 (14.91, 17.05) | 17.09 ± 0.27 (16.57, 17.62) |
|               | P-Value                     | < 0.001 | < 0.001                     | < 0.001                     |                             |
| North America | 95 <sup>th</sup> Percentile | Clim    | 15.01 ± 0.47 (14.04, 15.87) | 16.52 ± 0.38 (15.71, 17.19) | 17.53 ± 0.26 (17.07, 18.08) |
|               |                             | SSW     | 16.33 ± 0.58 (15.17, 17.45) | 17.81 ± 0.64 (16.49, 19.00) | 18.71 ± 0.30 (18.16, 19.31) |
|               | P-Value                     | < 0.001 | < 0.001                     | < 0.001                     |                             |
| Europe        | Median                      | Clim    | 10.05 ± 0.25 (9.61, 10.59)  | 11.29 ± 0.41 (10.49, 12.08) | 12.61 ± 0.37 (11.82, 13.26) |
|               |                             | SSW     | 10.43 ± 0.32 (9.84, 11.08)  | 11.55 ± 0.41 (10.79, 12.38) | 12.81 ± 0.36 (12.09, 13.48) |
|               | P-Value                     | 0.006   | 0.153                       | 0.214                       |                             |
| Europe        | 90 <sup>th</sup> Percentile | Clim    | 12.87 ± 0.45 (11.97, 13.74) | 14.62 ± 0.45 (13.66, 15.45) | 15.88 ± 0.28 (15.25, 16.35) |
|               |                             | SSW     | 13.85 ± 0.51 (12.85, 14.80) | 15.34 ± 0.49 (14.33, 16.26) | 16.31 ± 0.31 (15.67, 16.88) |
|               | P-Value                     | < 0.001 | 0.002                       | 0.003                       |                             |
| Europe        | 95 <sup>th</sup> Percentile | Clim    | 14.10 ± 0.53 (13.01, 15.05) | 15.91 ± 0.48 (14.92, 16.79) | 17.02 ± 0.26 (16.45, 17.46) |
|               |                             | SSW     | 15.29 ± 0.59 (14.08, 16.38) | 16.81 ± 0.52 (15.76, 17.77) | 17.61 ± 0.29 (17.01, 18.15) |
|               | P-Value                     | < 0.001 | < 0.001                     | < 0.001                     |                             |
| Asia          | Median                      | Clim    | 10.16 ± 0.26 (9.67, 10.69)  | 11.27 ± 0.37 (10.54, 12.00) | 12.52 ± 0.36 (11.79, 13.20) |
|               |                             | SSW     | 10.34 ± 0.26 (9.86, 10.90)  | 11.69 ± 0.41 (10.93, 12.51) | 12.87 ± 0.41 (12.00, 13.62) |
|               | P-Value                     | 0.120   | 0.020                       | 0.046                       |                             |
| Asia          | 90 <sup>th</sup> Percentile | Clim    | 12.90 ± 0.35 (12.17, 13.54) | 14.32 ± 0.39 (13.49, 15.01) | 15.76 ± 0.37 (14.99, 16.43) |
|               |                             | SSW     | 13.30 ± 0.47 (12.37, 14.19) | 15.34 ± 0.53 (14.28, 16.32) | 16.55 ± 0.45 (15.62, 17.37) |
|               | P-Value                     | 0.036   | < 0.001                     | < 0.001                     |                             |
| Asia          | 95 <sup>th</sup> Percentile | Clim    | 14.08 ± 0.39 (13.25, 14.79) | 15.53 ± 0.39 (14.69, 16.21) | 16.98 ± 0.35 (16.23, 17.60) |
|               |                             | SSW     | 14.63 ± 0.53 (13.55, 15.58) | 16.89 ± 0.59 (15.72, 17.99) | 18.00 ± 0.49 (17.01, 18.89) |
|               | P-Value                     | 0.012   | < 0.001                     | < 0.001                     |                             |

Table S6 – Same as Table S5 but for the 300–500 hPa subcolumn (upper troposphere).

| Region        | Statistic                   |       | Lag (days from onset)    |                          |                          |
|---------------|-----------------------------|-------|--------------------------|--------------------------|--------------------------|
|               |                             |       | 0-30                     | 30-60                    | 60-90                    |
| North America | Median                      | Clim  | 3.34 ± 0.08 (3.20, 3.50) | 3.68 ± 0.11 (3.47, 3.89) | 3.96 ± 0.08 (3.78, 4.11) |
|               |                             | SSW   | 3.41 ± 0.08 (3.28, 3.58) | 3.79 ± 0.10 (3.59, 3.98) | 4.07 ± 0.08 (3.90, 4.22) |
|               | P-Value                     | 0.053 | 0.024                    | 0.004                    |                          |
| North America | 90 <sup>th</sup> Percentile | Clim  | 4.25 ± 0.10 (4.05, 4.44) | 4.65 ± 0.11 (4.42, 4.85) | 4.92 ± 0.08 (4.75, 5.05) |
|               |                             | SSW   | 4.26 ± 0.09 (4.08, 4.42) | 4.69 ± 0.11 (4.47, 4.89) | 4.99 ± 0.07 (4.83, 5.12) |
|               | P-Value                     | 0.808 | 0.425                    | 0.041                    |                          |
| North America | 95 <sup>th</sup> Percentile | Clim  | 4.51 ± 0.12 (4.28, 4.74) | 4.98 ± 0.12 (4.72, 5.18) | 5.23 ± 0.08 (5.07, 5.37) |
|               |                             | SSW   | 4.51 ± 0.09 (4.32, 4.67) | 4.96 ± 0.11 (4.73, 5.17) | 5.29 ± 0.08 (5.12, 5.42) |
|               | P-Value                     | 1.000 | 0.688                    | 0.094                    |                          |
| Europe        | Median                      | Clim  | 3.53 ± 0.08 (3.38, 3.70) | 3.88 ± 0.12 (3.65, 4.10) | 4.23 ± 0.10 (4.01, 4.41) |
|               |                             | SSW   | 3.51 ± 0.08 (3.37, 3.68) | 3.92 ± 0.11 (3.70, 4.13) | 4.27 ± 0.09 (4.08, 4.43) |
|               | P-Value                     | 0.564 | 0.444                    | 0.336                    |                          |
| Europe        | 90 <sup>th</sup> Percentile | Clim  | 4.30 ± 0.14 (4.04, 4.57) | 4.80 ± 0.13 (4.51, 5.02) | 5.16 ± 0.10 (4.94, 5.33) |
|               |                             | SSW   | 4.25 ± 0.13 (4.00, 4.50) | 4.78 ± 0.16 (4.45, 5.07) | 5.12 ± 0.10 (4.90, 5.29) |
|               | P-Value                     | 0.412 | 0.751                    | 0.359                    |                          |
| Europe        | 95 <sup>th</sup> Percentile | Clim  | 4.54 ± 0.16 (4.23, 4.85) | 5.07 ± 0.13 (4.77, 5.27) | 5.43 ± 0.10 (5.22, 5.60) |
|               |                             | SSW   | 4.48 ± 0.15 (4.18, 4.74) | 5.05 ± 0.17 (4.68, 5.33) | 5.37 ± 0.10 (5.14, 5.54) |
|               | P-Value                     | 0.375 | 0.760                    | 0.170                    |                          |
| Asia          | Median                      | Clim  | 3.16 ± 0.09 (3.01, 3.35) | 3.53 ± 0.13 (3.27, 3.77) | 3.90 ± 0.11 (3.66, 4.10) |
|               |                             | SSW   | 3.22 ± 0.09 (3.06, 3.39) | 3.59 ± 0.11 (3.38, 3.81) | 3.98 ± 0.09 (3.79, 4.15) |
|               | P-Value                     | 0.134 | 0.257                    | 0.077                    |                          |
| Asia          | 90 <sup>th</sup> Percentile | Clim  | 4.05 ± 0.11 (3.85, 4.27) | 4.60 ± 0.18 (4.24, 4.94) | 5.13 ± 0.14 (4.82, 5.37) |
|               |                             | SSW   | 4.12 ± 0.10 (3.92, 4.31) | 4.65 ± 0.17 (4.32, 4.96) | 5.12 ± 0.14 (4.83, 5.38) |
|               | P-Value                     | 0.090 | 0.511                    | 0.869                    |                          |
| Asia          | 95 <sup>th</sup> Percentile | Clim  | 4.32 ± 0.13 (4.07, 4.55) | 4.97 ± 0.20 (4.56, 5.31) | 5.52 ± 0.14 (5.21, 5.76) |
|               |                             | SSW   | 4.40 ± 0.12 (4.16, 4.63) | 5.01 ± 0.18 (4.62, 5.32) | 5.53 ± 0.15 (5.20, 5.79) |
|               | P-Value                     | 0.149 | 0.627                    | 0.863                    |                          |

Table S7 – Same as Tables S5 and S6 but for the 900–1000 hPa subcolumn (PBL approximation).

| Region        | Statistic                   |       | Lag (days from onset)       |                             |                             |
|---------------|-----------------------------|-------|-----------------------------|-----------------------------|-----------------------------|
|               |                             |       | 0-30                        | 30-60                       | 60-90                       |
| North America | Median                      | Clim  | 38.08 ± 1.00 (36.25, 40.14) | 42.05 ± 1.24 (39.57, 44.45) | 45.25 ± 0.95 (43.22, 46.94) |
|               |                             | SSW   | 38.39 ± 0.99 (36.57, 40.37) | 43.13 ± 1.17 (40.80, 45.40) | 46.45 ± 0.77 (44.87, 47.85) |
|               | P-Value                     | 0.473 | 0.049                       | 0.004                       |                             |
| North America | 90 <sup>th</sup> Percentile | Clim  | 50.32 ± 1.25 (47.92, 52.78) | 55.12 ± 1.33 (52.27, 57.47) | 58.30 ± 0.93 (56.24, 59.87) |
|               |                             | SSW   | 50.43 ± 1.27 (48.00, 52.84) | 55.64 ± 1.35 (52.84, 58.06) | 59.01 ± 0.88 (57.09, 60.53) |
|               | P-Value                     | 0.840 | 0.374                       | 0.081                       |                             |
| North America | 95 <sup>th</sup> Percentile | Clim  | 53.41 ± 1.45 (50.60, 56.18) | 58.64 ± 1.47 (55.69, 61.33) | 62.30 ± 0.94 (60.19, 63.88) |
|               |                             | SSW   | 53.47 ± 1.42 (50.58, 56.07) | 59.05 ± 1.38 (56.06, 61.49) | 62.84 ± 0.91 (60.87, 64.39) |
|               | P-Value                     | 0.923 | 0.508                       | 0.186                       |                             |
| Europe        | Median                      | Clim  | 41.09 ± 1.01 (39.30, 43.19) | 45.31 ± 1.43 (42.42, 48.00) | 49.21 ± 1.13 (46.87, 51.25) |
|               |                             | SSW   | 40.90 ± 0.95 (39.22, 42.93) | 45.57 ± 1.27 (43.12, 48.08) | 49.63 ± 0.94 (47.62, 51.24) |
|               | P-Value                     | 0.654 | 0.645                       | 0.355                       |                             |
| Europe        | 90 <sup>th</sup> Percentile | Clim  | 50.54 ± 1.39 (47.80, 53.15) | 56.00 ± 1.52 (52.76, 58.71) | 60.27 ± 1.01 (57.92, 61.94) |
|               |                             | SSW   | 50.52 ± 1.63 (47.52, 53.74) | 55.97 ± 1.58 (52.74, 58.87) | 60.01 ± 0.99 (57.84, 61.69) |
|               | P-Value                     | 0.976 | 0.964                       | 0.549                       |                             |
| Europe        | 95 <sup>th</sup> Percentile | Clim  | 53.14 ± 1.51 (50.03, 55.92) | 59.04 ± 1.55 (55.59, 61.71) | 63.35 ± 1.08 (61.03, 65.27) |
|               |                             | SSW   | 53.28 ± 1.86 (49.49, 56.56) | 59.04 ± 1.70 (55.40, 61.90) | 62.86 ± 1.02 (60.66, 64.71) |
|               | P-Value                     | 0.848 | 1.000                       | 0.287                       |                             |
| Asia          | Median                      | Clim  | 34.47 ± 1.25 (33.22, 38.03) | 40.80 ± 1.78 (37.28, 44.24) | 45.81 ± 1.34 (42.87, 48.16) |
|               |                             | SSW   | 35.95 ± 1.13 (32.77, 38.18) | 41.49 ± 1.65 (38.21, 44.63) | 46.43 ± 1.25 (43.75, 48.72) |
|               | P-Value                     | 0.009 | 0.357                       | 0.275                       |                             |
| Asia          | 90 <sup>th</sup> Percentile | Clim  | 50.18 ± 1.27 (47.83, 52.76) | 56.87 ± 2.20 (52.50, 61.10) | 63.49 ± 1.72 (59.73, 66.48) |
|               |                             | SSW   | 50.96 ± 1.25 (48.49, 53.39) | 57.66 ± 1.96 (53.64, 61.29) | 63.73 ± 1.88 (59.90, 67.24) |
|               | P-Value                     | 0.162 | 0.385                       | 0.758                       |                             |
| Asia          | 95 <sup>th</sup> Percentile | Clim  | 54.53 ± 1.53 (51.61, 57.49) | 62.35 ± 2.38 (57.44, 66.76) | 69.37 ± 1.74 (65.48, 72.29) |
|               |                             | SSW   | 55.38 ± 1.52 (52.46, 58.36) | 63.02 ± 2.14 (58.51, 66.91) | 69.91 ± 2.03 (65.53, 73.49) |
|               | P-Value                     | 0.206 | 0.496                       | 0.511                       |                             |

Table S8 – Same as Tables S5–7 but for the model surface level.
